# Supplementary material for: Volcanic dust veils from sixth century tree-ring isotopes linked to reduced irradiance, primary production and human health
Source: PubMed Central journal article supplement (PMC5778132; doi:10.1038/s41598-018-19760-w), 2018-01-22
Supplement: 41598_2018_19760_MOESM1_ESM.pdf [file 41598_2018_19760_MOESM1_ESM.pdf]

Volcanic dust veils from sixth century tree-ring isotopes linked to reduced irradiance, primary production and human health

Samuli Helama, Laura Arppe, Joonas Uusitalo, Jari Holopainen, Hanna M. Mäkelä, Harri Mäkinen, Kari Mielikäinen, Pekka Nöjd, Raimo Sutinen, Jussi-Pekka Taavitsainen, Mauri Timonen & Markku Oinonen

Supplementary Information

## Content

- Figure S1: Correlations between the  $\delta^{13}\text{C}$  series
- Figure S2: Irradiance reconstruction
- Figure S3: Superposed epoch analysis
- Figure S4: Reductions in irradiance and volcanic events
- Figure S5: Cloud cover and the East Atlantic pattern
- Figure S6: Tree-ring dating
- Figure S7: Irradiance and mean average temperature
- Figure S8: Irradiance and mean maximum temperature
  
- Table S1: Site characteristics
- Table S2: Calibration and verification statistics
- Table S3: Reconstructed irradiance

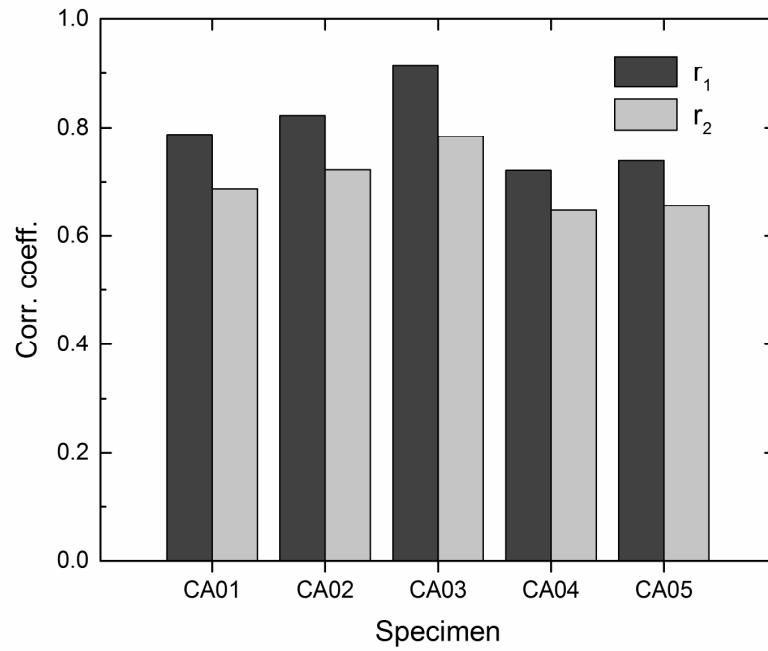

**Figure S1. Correlations between the subfossil  $\delta^{13}\text{C}$  series.** Linear (Pearson) correlations among the subfossil specimens illustrate their signal strength over the timeframe (AD 532–551) of volcanic events. Pearson correlations were assessed between each of the series to the mean of the other  $\delta^{13}\text{C}$  series ( $r_1$ ) and as mean inter-series correlations ( $r_2$ ).

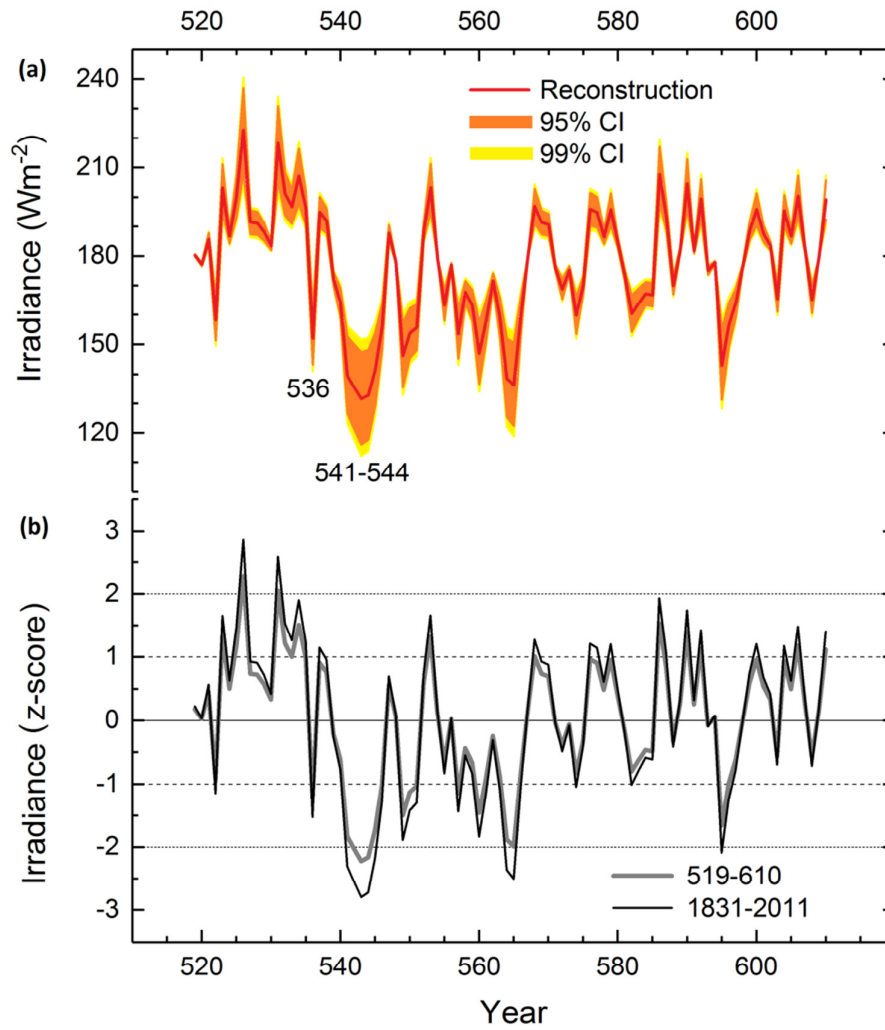

**Figure S2. Irradiance reconstruction.** The new tree-ring  $\delta^{13}\text{C}$  based reconstruction of solar irradiance (global radiation) (red line) with Monte Carlo based estimates of 95% (orange area) and 99% confidence (yellow area) intervals (a) transformed into z-scores, with a mean of zero and standard deviation of one, relative to the living tree (AD 1831–2011) and subfossil (AD 519–610) baseline values (b).

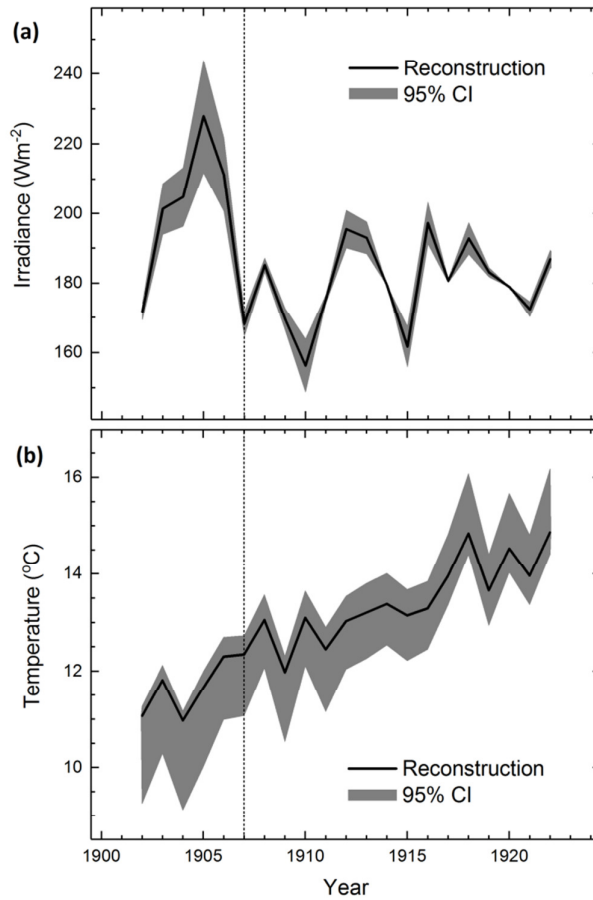

**Figure S3. Reconstructed post-eruption change.** Tree-ring based solar irradiance (this study) (a) and northern Fennoscandian summer-temperature (June through August) reconstructions<sup>37</sup> (b), with estimates of 95% (gray area) confidence intervals, relative to Ksudach (Russia) eruption in March AD 1907 (vertical dashed line), representing the strongest post-eruptive reduction in reconstructed irradiance data over the living tree (AD 1831–2011) period. In contrast, the response in summer temperature appears largely masked by the overlapping trend of early 20th century warming.

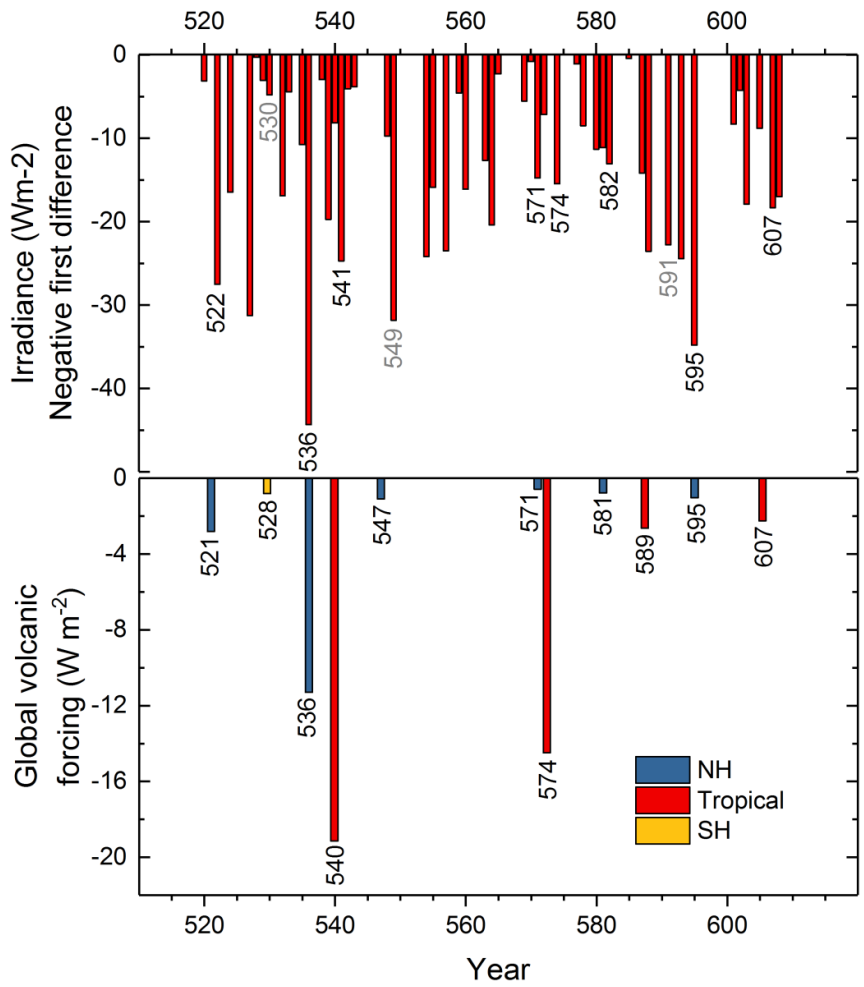

**Figure S4. Reductions in irradiance and volcanic events.** Negative first difference of the reconstructed irradiance recording the change in irradiance from previous to concurrent year (this study) compared with the volcanic aerosol forcing events from ice core evidence with list of eruptions of Northern Hemisphere (NH), tropical and Southern Hemisphere (SH) origin over sixth century<sup>2</sup>. The years with strongest post-eruptive irradiance anomaly with lag of 0–1 year indicated with black ink, the years with lag of 2 years indicated with gray ink.

corr Jun–Aug averaged CPC EA  
with Jun–Aug averaged CRU TS3.24.01 cloud fraction 1950:2015  $p < 10\%$

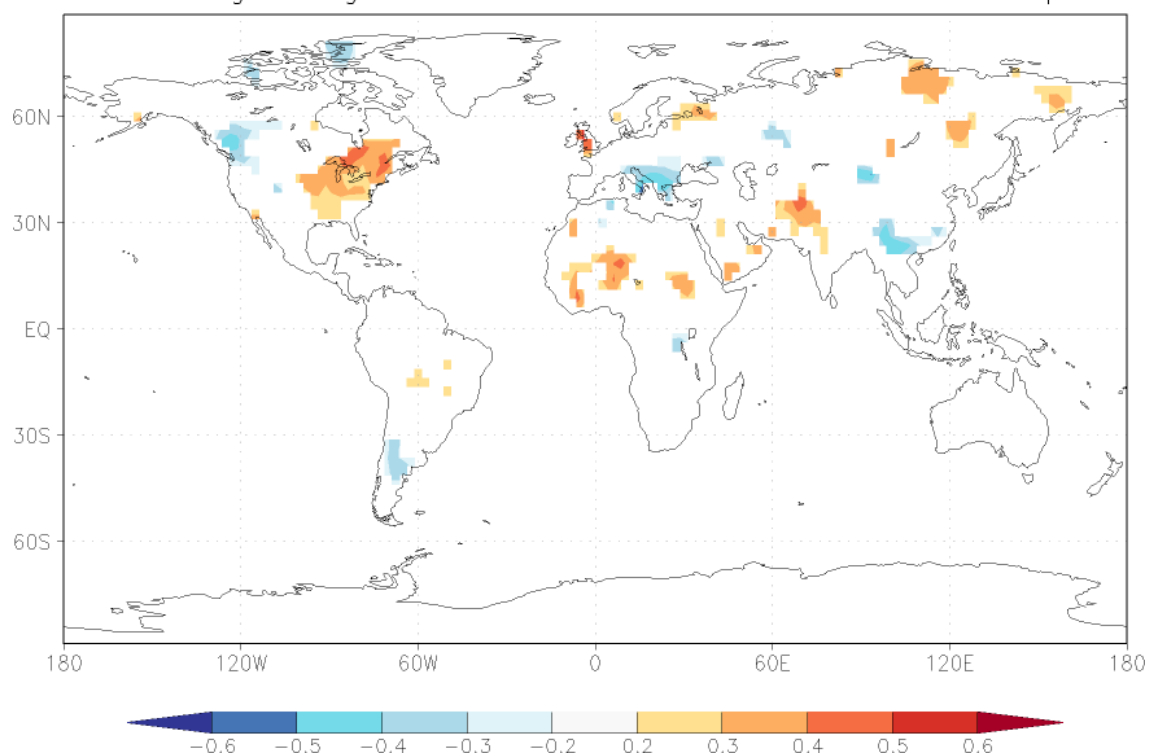

**Figure S5. Spatial correlations.** Correlations were calculated between the summertime cloud cover (Harris, I. *et al. Int. J. Climatol.* 34, 623–642 (2014)) and East Atlantic pattern<sup>47</sup> produced at the <https://climexp.knmi.nl/> (Trouet, V. & van Oldenborgh, G. J. *Tree-Ring Res.* 69, 623–642 (2013)).

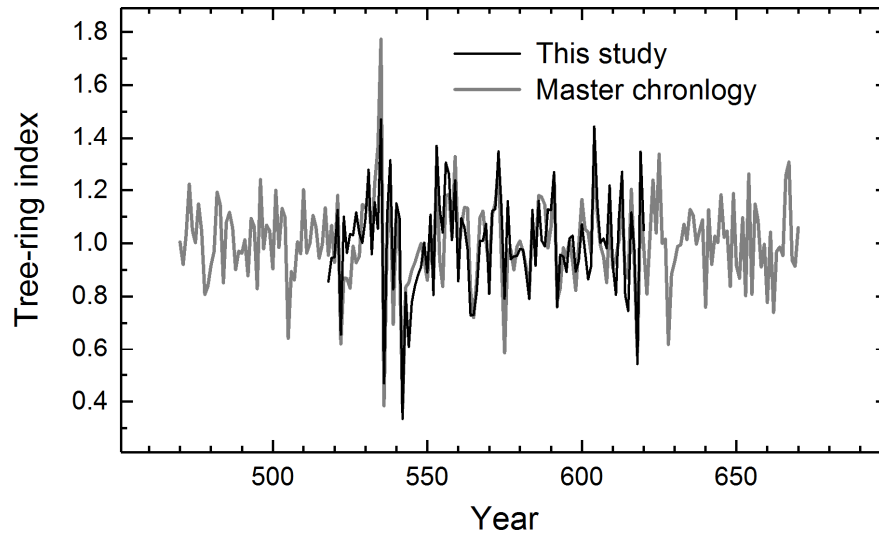

**Figure S6. Tree-ring dating.** Comparison between the mean chronology of our *Pinus sylvestris* samples and the existing master chronology<sup>57</sup>. The ring-width data were converted into tree-ring indices using the dating algorithms (Holmes, R. L. *Tree-Ring Bull.* 43, 69–78 (1983)).

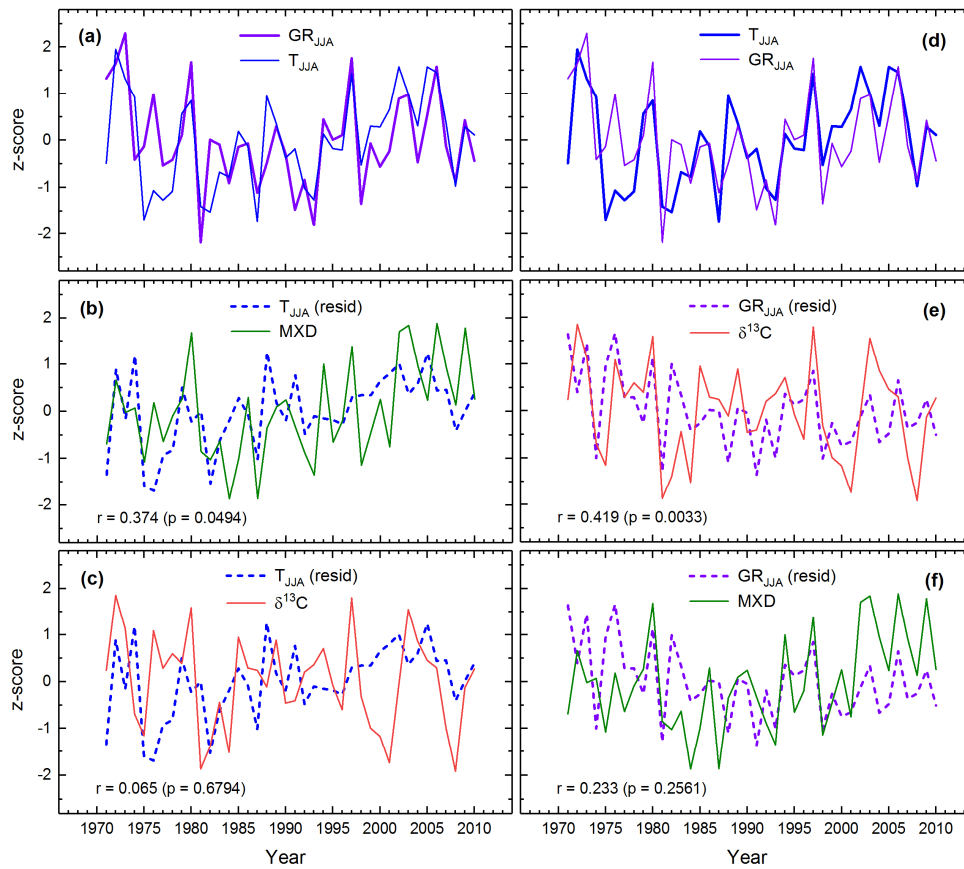

**Figure S7. Irradiance and mean average temperature.** Mean average summer (June–August) temperature ( $T_{\text{JJA}}$ ) data was regressed against the global radiation ( $\text{GR}_{\text{JJA}}$ ) over same season ( $r = 0.642$ ) (a), and the residuals from that model ( $T_{\text{JJA}}$  (resid)) correlated with the maximum-latewood density (MXD) chronology<sup>37</sup> (b) and with the  $\delta^{13}\text{C}$  chronology of this study (c). The  $\text{GR}_{\text{JJA}}$  data was regressed against the  $T_{\text{JJA}}$  data (d), and the residuals from that model ( $\text{GR}_{\text{JJA}}$  (resid)) correlated with the  $\delta^{13}\text{C}$  (e) and the MXD records (f). Statistical significance ( $p$ ) of Pearson correlations ( $r$ ) was assessed using the Monte Carlo simulations<sup>68</sup>.



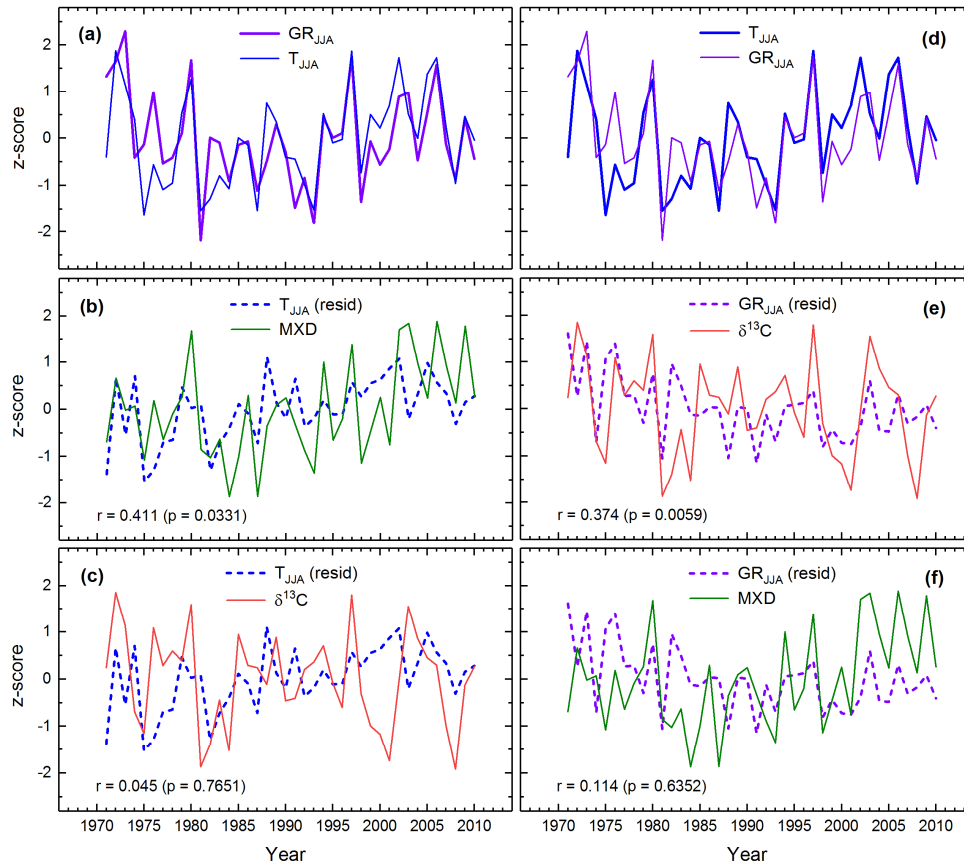

**Figure S8. Irradiance and mean maximum temperature.** Mean maximum summer (June–August) temperature ( $T_{\text{JJA}}$ ) data was regressed against the global radiation ( $\text{GR}_{\text{JJA}}$ ) over same season ( $r = 0.737$ ) (a), and the residuals from that model ( $T_{\text{JJA}}$  (resid)) correlated with the maximum-latewood density (MXD) chronology<sup>37</sup> (b) and with the  $\delta^{13}\text{C}$  chronology of this study (c). The  $\text{GR}_{\text{JJA}}$  data was regressed against the  $T_{\text{JJA}}$  data (d), and the residuals from that model ( $\text{GR}_{\text{JJA}}$  (resid)) correlated with the  $\delta^{13}\text{C}$  (e) and the MXD records (f). Statistical significance ( $p$ ) of Pearson correlations ( $r$ ) was assessed using the Monte Carlo simulations<sup>68</sup>.

**Table S1. Site characteristics.**

| Specimen | Lat   | Long  | Alt | Site          | Habitat  | Position   |
|----------|-------|-------|-----|---------------|----------|------------|
| CA01     | 68.57 | 23.48 | 366 | Näkkälä       | Riparian | Timberline |
| CA02     | 68.47 | 22.96 | 343 | Kultima       | Riparian | Forest     |
| CA03     | 68.47 | 28.00 | 183 | Luolajärvi    | Riparian | Forest     |
| CA04     | 68.55 | 22.14 | 382 | Autsasenkursu | Upland   | Timberline |
| CA05     | 68.57 | 23.48 | 366 | Näkkälä       | Riparian | Timberline |

Sites are described for their latitude, longitude, altitude (Alt; meters above sea level), habitat and position.

**Table S2. Calibration and verification statistics.**

| Statistic | Calibration | Verification | $\delta^{13}\text{C}_{\text{FULL}}$ | $\delta^{13}\text{C}_{\text{JK-01}}$ | $\delta^{13}\text{C}_{\text{JK-02}}$ | $\delta^{13}\text{C}_{\text{JK-03}}$ | $\delta^{13}\text{C}_{\text{JK-04}}$ | $\delta^{13}\text{C}_{\text{JK-05}}$ |
|-----------|-------------|--------------|-------------------------------------|--------------------------------------|--------------------------------------|--------------------------------------|--------------------------------------|--------------------------------------|
| $R^2$     | 1971–2011   |              | 0.522                               | 0.528                                | 0.519                                | 0.432                                | 0.474                                | 0.542                                |
| p         | 1971–2011   |              | <0.0001                             | <0.0001                              | 0.0001                               | <0.0001                              | <0.0001                              | <0.0001                              |
| $R^2$     | 1992–2011   | 1971–1991    | 0.536                               | 0.535                                | 0.548                                | 0.439                                | 0.508                                | 0.558                                |
| p         | 1992–2011   | 1971–1991    | 0.0014                              | 0.0011                               | 0.0013                               | 0.0065                               | 0.0008                               | 0.0006                               |
| $r^2$     | 1992–2011   | 1971–1991    | 0.517                               | 0.547                                | 0.498                                | 0.445                                | 0.439                                | 0.531                                |
| p         | 1992–2011   | 1971–1991    | 0.0017                              | 0.0019                               | 0.0026                               | 0.0049                               | 0.0061                               | 0.0018                               |
| RE        | 1992–2011   | 1971–1991    | 0.480                               | 0.483                                | 0.431                                | 0.394                                | 0.387                                | 0.501                                |
| p         | 1992–2011   | 1971–1991    | 0.0004                              | 0.0010                               | 0.0007                               | 0.0014                               | 0.0012                               | 0.0001                               |
| CE        | 1992–2011   | 1971–1991    | 0.474                               | 0.477                                | 0.424                                | 0.387                                | 0.379                                | 0.495                                |
| p         | 1992–2011   | 1971–1991    | 0.0002                              | 0.0007                               | 0.0005                               | 0.0008                               | 0.0005                               | 0.0001                               |
| $R^2$     | 1971–1991   | 1992–2011    | 0.517                               | 0.547                                | 0.498                                | 0.445                                | 0.439                                | 0.531                                |
| p         | 1971–1991   | 1992–2011    | 0.0017                              | 0.0019                               | 0.0026                               | 0.0049                               | 0.0061                               | 0.0018                               |
| $r^2$     | 1971–1991   | 1992–2011    | 0.536                               | 0.535                                | 0.548                                | 0.439                                | 0.508                                | 0.558                                |
| p         | 1971–1991   | 1992–2011    | 0.0014                              | 0.0011                               | 0.0013                               | 0.0065                               | 0.0008                               | 0.0006                               |
| RE        | 1971–1991   | 1992–2011    | 0.512                               | 0.501                                | 0.514                                | 0.411                                | 0.477                                | 0.537                                |
| p         | 1971–1991   | 1992–2011    | 0.0003                              | 0.0004                               | 0.0003                               | 0.0003                               | 0.0002                               | 0.0001                               |
| CE        | 1971–1991   | 1992–2011    | 0.509                               | 0.498                                | 0.510                                | 0.407                                | 0.474                                | 0.533                                |
| p         | 1971–1991   | 1992–2011    | 0.0002                              | 0.0002                               | 0.0002                               | 0.0001                               | 0.0001                               | 0.0001                               |

Reconstructions of global radiation were derived from the chronology with full set of  $\delta^{13}\text{C}$  data ( $\delta^{13}\text{C}_{\text{FULL}}$ ) and from the jack-knifed ( $\delta^{13}\text{C}_{\text{JK}}$ ) estimates of the  $\delta^{13}\text{C}$  chronology. Calibrations are quantified using the coefficient of determination ( $R^2$ ) and verifications using the squared correlation coefficient ( $r^2$ ), the reduction of error (RE) and the coefficient of efficiency (CE) statistics with their obtained Monte Carlo based<sup>68</sup> statistical significance (p).

**Table S3. Reconstructed irradiance ( $\text{Wm}^{-2}$ ) values with their Monte Carlo based estimates of confidence intervals (CI).**

| Year | Irradiance | Lower 95% CI | Upper 95% CI | Lower 99% CI | Upper 99% CI |
|------|------------|--------------|--------------|--------------|--------------|
| 519  | 180.2      | 179.8        | 180.6        | 179.7        | 180.7        |
| 520  | 177.1      | 176.4        | 177.8        | 176.3        | 177.9        |
| 521  | 185.6      | 183.5        | 187.8        | 182.9        | 188.3        |
| 522  | 158.1      | 151.3        | 165.1        | 149.6        | 167.0        |
| 523  | 203.2      | 195.2        | 211.0        | 193.0        | 213.0        |
| 524  | 186.7      | 184.2        | 189.2        | 183.5        | 189.8        |
| 525  | 200.2      | 193.2        | 207.0        | 191.3        | 208.7        |
| 526  | 222.7      | 208.2        | 236.9        | 204.3        | 240.5        |
| 527  | 191.5      | 187.3        | 195.5        | 186.3        | 196.5        |
| 528  | 191.2      | 187.2        | 195.1        | 186.1        | 196.1        |
| 529  | 188.1      | 185.1        | 191.0        | 184.3        | 191.8        |
| 530  | 183.3      | 181.9        | 184.7        | 181.5        | 185.0        |
| 531  | 218.1      | 205.2        | 230.8        | 201.7        | 234.1        |
| 532  | 201.3      | 193.9        | 208.5        | 191.9        | 210.3        |
| 533  | 196.8      | 190.9        | 202.6        | 189.4        | 204.1        |
| 534  | 207.1      | 197.8        | 216.3        | 195.3        | 218.6        |
| 535  | 196.4      | 190.6        | 202.0        | 189.1        | 203.4        |
| 536  | 152.0      | 143.2        | 161.0        | 141.0        | 163.4        |
| 537  | 195.0      | 189.7        | 200.1        | 188.3        | 201.4        |
| 538  | 192.0      | 187.7        | 196.2        | 186.6        | 197.3        |
| 539  | 172.3      | 170.1        | 174.5        | 169.5        | 175.2        |
| 540  | 164.1      | 159.3        | 169.1        | 158.0        | 170.4        |
| 541  | 139.4      | 126.5        | 152.6        | 123.2        | 156.1        |
| 542  | 135.3      | 121.1        | 149.9        | 117.5        | 153.8        |
| 543  | 131.5      | 116.1        | 147.4        | 112.1        | 151.6        |
| 544  | 132.7      | 117.6        | 148.1        | 113.8        | 152.3        |
| 545  | 141.4      | 129.2        | 154.0        | 126.1        | 157.3        |
| 546  | 156.0      | 148.5        | 163.7        | 146.6        | 165.7        |
| 547  | 187.7      | 184.9        | 190.5        | 184.1        | 191.3        |
| 548  | 178.0      | 177.6        | 178.4        | 177.6        | 178.5        |
| 549  | 146.2      | 135.5        | 157.1        | 132.7        | 160.0        |
| 550  | 153.7      | 145.5        | 162.2        | 143.4        | 164.4        |
| 551  | 155.7      | 148.0        | 163.5        | 146.1        | 165.5        |
| 552  | 188.4      | 185.3        | 191.5        | 184.5        | 192.2        |
| 553  | 203.3      | 195.2        | 211.1        | 193.1        | 213.1        |
| 554  | 179.1      | 179.0        | 179.1        | 179.0        | 179.1        |
| 555  | 163.2      | 158.0        | 168.5        | 156.7        | 169.9        |
| 556  | 177.0      | 176.3        | 177.7        | 176.1        | 177.9        |
| 557  | 153.5      | 145.2        | 162.0        | 143.1        | 164.3        |
| 558  | 167.7      | 164.0        | 171.5        | 163.1        | 172.5        |
| 559  | 163.1      | 157.9        | 168.4        | 156.6        | 169.9        |
| 560  | 147.0      | 136.6        | 157.7        | 134.0        | 160.5        |
| 561  | 158.0      | 151.1        | 165.0        | 149.4        | 166.9        |
| 562  | 171.6      | 169.1        | 174.1        | 168.5        | 174.8        |

|     |       |       |       |       |       |
|-----|-------|-------|-------|-------|-------|
| 563 | 158.9 | 152.4 | 165.6 | 150.7 | 167.4 |
| 564 | 138.5 | 125.3 | 152.0 | 122.0 | 155.6 |
| 565 | 136.3 | 122.3 | 150.5 | 118.8 | 154.3 |
| 566 | 159.5 | 153.2 | 166.0 | 151.5 | 167.8 |
| 567 | 179.4 | 179.3 | 179.4 | 179.2 | 179.5 |
| 568 | 197.0 | 191.0 | 202.8 | 189.5 | 204.3 |
| 569 | 191.5 | 187.3 | 195.5 | 186.2 | 196.5 |
| 570 | 190.6 | 186.8 | 194.4 | 185.8 | 195.4 |
| 571 | 175.9 | 174.8 | 176.9 | 174.6 | 177.2 |
| 572 | 168.7 | 165.3 | 172.2 | 164.5 | 173.1 |
| 573 | 175.2 | 174.0 | 176.5 | 173.7 | 176.9 |
| 574 | 159.8 | 153.5 | 166.2 | 151.9 | 167.9 |
| 575 | 170.0 | 167.1 | 173.0 | 166.3 | 173.8 |
| 576 | 196.0 | 190.4 | 201.5 | 188.9 | 202.9 |
| 577 | 194.9 | 189.6 | 200.1 | 188.2 | 201.4 |
| 578 | 186.4 | 184.0 | 188.8 | 183.3 | 189.4 |
| 579 | 195.8 | 190.3 | 201.3 | 188.8 | 202.7 |
| 580 | 184.5 | 182.7 | 186.3 | 182.2 | 186.7 |
| 581 | 173.4 | 171.5 | 175.3 | 171.1 | 175.8 |
| 582 | 160.3 | 154.2 | 166.6 | 152.7 | 168.2 |
| 583 | 163.8 | 158.9 | 168.9 | 157.6 | 170.3 |
| 584 | 167.1 | 163.3 | 171.1 | 162.3 | 172.2 |
| 585 | 166.7 | 162.7 | 170.8 | 161.7 | 171.9 |
| 586 | 207.6 | 198.1 | 216.9 | 195.6 | 219.3 |
| 587 | 193.5 | 188.7 | 198.1 | 187.4 | 199.3 |
| 588 | 169.9 | 166.9 | 173.0 | 166.2 | 173.8 |
| 589 | 182.0 | 181.0 | 182.9 | 180.8 | 183.2 |
| 590 | 204.5 | 196.1 | 212.8 | 193.8 | 214.9 |
| 591 | 181.8 | 180.9 | 182.6 | 180.6 | 182.8 |
| 592 | 199.4 | 192.7 | 206.1 | 190.9 | 207.7 |
| 593 | 175.0 | 173.7 | 176.4 | 173.3 | 176.7 |
| 594 | 177.8 | 177.3 | 178.2 | 177.2 | 178.3 |
| 595 | 143.0 | 131.2 | 155.0 | 128.2 | 158.2 |
| 596 | 156.5 | 149.1 | 164.0 | 147.2 | 166.0 |
| 597 | 163.9 | 159.0 | 169.0 | 157.7 | 170.3 |
| 598 | 176.2 | 175.2 | 177.2 | 175.0 | 177.4 |
| 599 | 188.5 | 185.4 | 191.6 | 184.6 | 192.4 |
| 600 | 195.9 | 190.3 | 201.3 | 188.8 | 202.7 |
| 601 | 187.6 | 184.8 | 190.3 | 184.0 | 191.0 |
| 602 | 183.3 | 181.9 | 184.7 | 181.5 | 185.0 |
| 603 | 165.4 | 161.0 | 170.0 | 159.9 | 171.2 |
| 604 | 195.4 | 190.0 | 200.7 | 188.5 | 202.1 |
| 605 | 186.6 | 184.1 | 189.1 | 183.5 | 189.7 |
| 606 | 200.4 | 193.3 | 207.3 | 191.4 | 209.1 |
| 607 | 182.0 | 181.1 | 183.0 | 180.8 | 183.3 |
| 608 | 165.0 | 160.5 | 169.7 | 159.3 | 171.0 |
| 609 | 179.6 | 179.4 | 179.7 | 179.4 | 179.8 |
| 610 | 199.1 | 192.5 | 205.7 | 190.7 | 207.3 |

|      |       |       |       |       |       |
|------|-------|-------|-------|-------|-------|
| 1831 | 208.4 | 198.7 | 218.1 | 196.0 | 220.7 |
| 1832 | 188.5 | 185.4 | 191.6 | 184.5 | 192.4 |
| 1833 | 153.9 | 145.6 | 162.2 | 143.3 | 164.5 |
| 1834 | 154.8 | 146.9 | 162.9 | 144.7 | 165.1 |
| 1835 | 178.7 | 178.5 | 178.8 | 178.5 | 178.8 |
| 1836 | 187.7 | 184.8 | 190.5 | 184.1 | 191.3 |
| 1837 | 176.8 | 176.0 | 177.5 | 175.8 | 177.8 |
| 1838 | 198.1 | 191.8 | 204.4 | 190.1 | 206.1 |
| 1839 | 203.6 | 195.5 | 211.6 | 193.2 | 213.8 |
| 1840 | 213.5 | 202.1 | 224.8 | 199.0 | 227.9 |
| 1841 | 206.0 | 197.1 | 214.9 | 194.6 | 217.3 |
| 1842 | 191.2 | 187.2 | 195.2 | 186.1 | 196.3 |
| 1843 | 176.3 | 175.4 | 177.3 | 175.2 | 177.5 |
| 1844 | 205.6 | 196.8 | 214.3 | 194.4 | 216.6 |
| 1845 | 215.1 | 203.2 | 227.0 | 199.9 | 230.2 |
| 1846 | 186.8 | 184.3 | 189.4 | 183.6 | 190.1 |
| 1847 | 202.7 | 194.9 | 210.5 | 192.8 | 212.6 |
| 1848 | 167.3 | 163.5 | 171.2 | 162.4 | 172.3 |
| 1849 | 180.1 | 179.8 | 180.4 | 179.7 | 180.5 |
| 1850 | 188.8 | 185.6 | 192.0 | 184.7 | 192.8 |
| 1851 | 169.5 | 166.4 | 172.7 | 165.5 | 173.6 |
| 1852 | 192.8 | 188.3 | 197.4 | 187.0 | 198.6 |
| 1853 | 172.6 | 170.4 | 174.7 | 169.8 | 175.3 |
| 1854 | 190.9 | 187.0 | 194.7 | 185.9 | 195.8 |
| 1855 | 183.5 | 182.1 | 185.0 | 181.7 | 185.4 |
| 1856 | 167.5 | 163.7 | 171.4 | 162.7 | 172.4 |
| 1857 | 176.2 | 175.3 | 177.2 | 175.0 | 177.4 |
| 1858 | 202.5 | 194.8 | 210.2 | 192.6 | 212.3 |
| 1859 | 171.6 | 169.2 | 174.1 | 168.5 | 174.8 |
| 1860 | 172.5 | 170.3 | 174.7 | 169.7 | 175.3 |
| 1861 | 201.6 | 194.2 | 209.0 | 192.1 | 211.0 |
| 1862 | 150.6 | 141.2 | 160.0 | 138.6 | 162.6 |
| 1863 | 154.5 | 146.5 | 162.7 | 144.3 | 164.9 |
| 1864 | 166.9 | 162.9 | 170.9 | 161.8 | 172.1 |
| 1865 | 176.7 | 175.9 | 177.5 | 175.7 | 177.7 |
| 1866 | 166.6 | 162.6 | 170.8 | 161.4 | 171.9 |
| 1867 | 184.5 | 182.7 | 186.3 | 182.2 | 186.8 |
| 1868 | 202.7 | 194.9 | 210.4 | 192.7 | 212.6 |
| 1869 | 186.3 | 183.9 | 188.7 | 183.3 | 189.3 |
| 1870 | 192.6 | 188.1 | 197.0 | 186.9 | 198.2 |
| 1871 | 177.0 | 176.3 | 177.7 | 176.1 | 177.9 |
| 1872 | 184.4 | 182.6 | 186.1 | 182.2 | 186.6 |
| 1873 | 200.7 | 193.5 | 207.8 | 191.6 | 209.7 |
| 1874 | 173.3 | 171.4 | 175.2 | 170.9 | 175.8 |
| 1875 | 185.1 | 183.1 | 187.1 | 182.6 | 187.6 |
| 1876 | 190.1 | 186.4 | 193.7 | 185.4 | 194.7 |
| 1877 | 183.5 | 182.0 | 184.9 | 181.6 | 185.3 |

|      |       |       |       |       |       |
|------|-------|-------|-------|-------|-------|
| 1878 | 173.8 | 172.0 | 175.5 | 171.6 | 176.0 |
| 1879 | 205.5 | 196.8 | 214.2 | 194.4 | 216.6 |
| 1880 | 186.2 | 183.8 | 188.5 | 183.2 | 189.1 |
| 1881 | 194.1 | 189.2 | 199.1 | 187.8 | 200.4 |
| 1882 | 209.9 | 199.7 | 220.0 | 196.9 | 222.7 |
| 1883 | 205.3 | 196.6 | 213.8 | 194.2 | 216.2 |
| 1884 | 199.4 | 192.7 | 206.1 | 190.8 | 207.9 |
| 1885 | 184.3 | 182.6 | 186.0 | 182.1 | 186.5 |
| 1886 | 200.4 | 193.3 | 207.3 | 191.4 | 209.2 |
| 1887 | 184.7 | 182.9 | 186.6 | 182.4 | 187.1 |
| 1888 | 196.7 | 190.9 | 202.5 | 189.3 | 204.1 |
| 1889 | 197.4 | 191.4 | 203.4 | 189.7 | 205.1 |
| 1890 | 189.3 | 185.9 | 192.6 | 185.0 | 193.6 |
| 1891 | 215.5 | 203.5 | 227.5 | 200.1 | 230.7 |
| 1892 | 173.7 | 171.9 | 175.5 | 171.4 | 176.0 |
| 1893 | 197.0 | 191.1 | 202.9 | 189.4 | 204.5 |
| 1894 | 246.5 | 224.2 | 268.6 | 218.0 | 274.6 |
| 1895 | 227.7 | 211.6 | 243.6 | 207.2 | 248.0 |
| 1896 | 209.9 | 199.7 | 220.0 | 196.9 | 222.8 |
| 1897 | 183.5 | 182.1 | 185.0 | 181.7 | 185.4 |
| 1898 | 181.2 | 180.5 | 181.9 | 180.3 | 182.1 |
| 1899 | 174.2 | 172.6 | 175.8 | 172.1 | 176.3 |
| 1900 | 151.4 | 142.3 | 160.6 | 139.8 | 163.1 |
| 1901 | 211.0 | 200.4 | 221.4 | 197.5 | 224.3 |
| 1902 | 171.8 | 169.4 | 174.2 | 168.7 | 174.9 |
| 1903 | 201.3 | 194.0 | 208.6 | 191.9 | 210.6 |
| 1904 | 204.8 | 196.3 | 213.2 | 193.9 | 215.5 |
| 1905 | 227.9 | 211.7 | 243.9 | 207.3 | 248.3 |
| 1906 | 211.2 | 200.6 | 221.7 | 197.6 | 224.6 |
| 1907 | 168.2 | 164.7 | 171.8 | 163.7 | 172.8 |
| 1908 | 185.2 | 183.2 | 187.2 | 182.6 | 187.7 |
| 1909 | 169.5 | 166.3 | 172.6 | 165.4 | 173.5 |
| 1910 | 156.3 | 148.8 | 163.8 | 146.7 | 165.9 |
| 1911 | 175.5 | 174.3 | 176.7 | 174.0 | 177.0 |
| 1912 | 195.5 | 190.1 | 200.8 | 188.6 | 202.3 |
| 1913 | 193.0 | 188.4 | 197.5 | 187.1 | 198.8 |
| 1914 | 179.3 | 179.2 | 179.4 | 179.2 | 179.4 |
| 1915 | 161.6 | 155.9 | 167.4 | 154.3 | 169.0 |
| 1916 | 197.2 | 191.2 | 203.2 | 189.6 | 204.8 |
| 1917 | 180.7 | 180.2 | 181.2 | 180.0 | 181.4 |
| 1918 | 192.8 | 188.3 | 197.3 | 187.0 | 198.5 |
| 1919 | 183.1 | 181.8 | 184.4 | 181.4 | 184.7 |
| 1920 | 178.9 | 178.8 | 178.9 | 178.8 | 179.0 |
| 1921 | 172.4 | 170.2 | 174.6 | 169.6 | 175.2 |
| 1922 | 186.8 | 184.3 | 189.4 | 183.6 | 190.1 |
| 1923 | 167.1 | 163.2 | 171.1 | 162.1 | 172.2 |
| 1924 | 198.6 | 192.2 | 205.1 | 190.4 | 206.8 |
| 1925 | 196.4 | 190.7 | 202.1 | 189.1 | 203.6 |

|      |       |       |       |       |       |
|------|-------|-------|-------|-------|-------|
| 1926 | 190.5 | 186.7 | 194.2 | 185.7 | 195.2 |
| 1927 | 212.1 | 201.2 | 222.9 | 198.2 | 225.9 |
| 1928 | 162.4 | 156.9 | 167.9 | 155.4 | 169.4 |
| 1929 | 169.5 | 166.4 | 172.7 | 165.5 | 173.6 |
| 1930 | 214.8 | 203.0 | 226.5 | 199.7 | 229.7 |
| 1931 | 185.4 | 183.3 | 187.5 | 182.8 | 188.1 |
| 1932 | 175.6 | 174.5 | 176.8 | 174.1 | 177.1 |
| 1933 | 194.6 | 189.5 | 199.7 | 188.1 | 201.1 |
| 1934 | 205.7 | 196.9 | 214.4 | 194.5 | 216.8 |
| 1935 | 179.9 | 179.6 | 180.2 | 179.6 | 180.2 |
| 1936 | 184.3 | 182.6 | 186.0 | 182.1 | 186.4 |
| 1937 | 207.8 | 198.3 | 217.2 | 195.7 | 219.8 |
| 1938 | 184.1 | 182.4 | 185.7 | 182.0 | 186.2 |
| 1939 | 177.3 | 176.7 | 177.9 | 176.5 | 178.1 |
| 1940 | 165.5 | 161.1 | 170.0 | 159.9 | 171.3 |
| 1941 | 201.7 | 194.2 | 209.1 | 192.1 | 211.1 |
| 1942 | 175.5 | 174.3 | 176.7 | 174.0 | 177.0 |
| 1943 | 171.5 | 169.0 | 174.0 | 168.3 | 174.7 |
| 1944 | 183.4 | 182.0 | 184.8 | 181.6 | 185.2 |
| 1945 | 207.3 | 197.9 | 216.5 | 195.4 | 219.0 |
| 1946 | 186.3 | 183.9 | 188.7 | 183.3 | 189.3 |
| 1947 | 190.9 | 187.0 | 194.7 | 185.9 | 195.8 |
| 1948 | 190.2 | 186.5 | 193.8 | 185.5 | 194.8 |
| 1949 | 166.7 | 162.6 | 170.8 | 161.5 | 171.9 |
| 1950 | 182.0 | 181.1 | 183.0 | 180.8 | 183.3 |
| 1951 | 168.1 | 164.5 | 171.8 | 163.5 | 172.8 |
| 1952 | 169.6 | 166.5 | 172.8 | 165.7 | 173.6 |
| 1953 | 199.9 | 193.0 | 206.7 | 191.1 | 208.6 |
| 1954 | 177.6 | 177.0 | 178.1 | 176.9 | 178.2 |
| 1955 | 183.5 | 182.1 | 185.0 | 181.7 | 185.4 |
| 1956 | 170.3 | 167.4 | 173.2 | 166.6 | 174.0 |
| 1957 | 173.4 | 171.5 | 175.3 | 171.0 | 175.8 |
| 1958 | 159.8 | 153.4 | 166.2 | 151.7 | 167.9 |
| 1959 | 192.0 | 187.7 | 196.2 | 186.5 | 197.4 |
| 1960 | 192.2 | 187.8 | 196.5 | 186.7 | 197.6 |
| 1961 | 175.6 | 174.4 | 176.8 | 174.1 | 177.1 |
| 1962 | 158.3 | 151.5 | 165.2 | 149.7 | 167.1 |
| 1963 | 177.2 | 176.6 | 177.8 | 176.4 | 178.0 |
| 1964 | 188.1 | 185.1 | 191.0 | 184.3 | 191.8 |
| 1965 | 172.5 | 170.4 | 174.7 | 169.8 | 175.3 |
| 1966 | 186.3 | 183.9 | 188.7 | 183.3 | 189.3 |
| 1967 | 182.6 | 181.4 | 183.7 | 181.1 | 184.0 |
| 1968 | 164.1 | 159.2 | 169.1 | 157.8 | 170.4 |
| 1969 | 192.6 | 188.2 | 197.1 | 186.9 | 198.3 |
| 1970 | 197.2 | 191.2 | 203.1 | 189.6 | 204.8 |
| 1971 | 181.9 | 180.9 | 182.8 | 180.7 | 183.0 |
| 1972 | 201.6 | 194.1 | 209.0 | 192.1 | 211.0 |
| 1973 | 192.8 | 188.3 | 197.3 | 187.0 | 198.6 |



|      |       |       |       |       |       |
|------|-------|-------|-------|-------|-------|
| 1974 | 170.4 | 167.6 | 173.3 | 166.8 | 174.1 |
| 1975 | 164.8 | 160.1 | 169.5 | 158.8 | 170.8 |
| 1976 | 192.2 | 187.9 | 196.5 | 186.7 | 197.7 |
| 1977 | 182.4 | 181.3 | 183.5 | 181.0 | 183.8 |
| 1978 | 186.2 | 183.8 | 188.5 | 183.2 | 189.2 |
| 1979 | 183.7 | 182.2 | 185.2 | 181.8 | 185.6 |
| 1980 | 198.4 | 192.0 | 204.7 | 190.3 | 206.5 |
| 1981 | 156.0 | 148.4 | 163.6 | 146.3 | 165.8 |
| 1982 | 161.9 | 156.2 | 167.6 | 154.6 | 169.1 |
| 1983 | 173.5 | 171.7 | 175.3 | 171.2 | 175.9 |
| 1984 | 160.3 | 154.1 | 166.5 | 152.4 | 168.2 |
| 1985 | 190.5 | 186.7 | 194.3 | 185.7 | 195.3 |
| 1986 | 182.4 | 181.3 | 183.6 | 181.0 | 183.9 |
| 1987 | 181.9 | 180.9 | 182.8 | 180.7 | 183.0 |
| 1988 | 177.6 | 177.1 | 178.1 | 176.9 | 178.2 |
| 1989 | 189.8 | 186.2 | 193.3 | 185.3 | 194.2 |
| 1990 | 173.3 | 171.4 | 175.2 | 170.9 | 175.8 |
| 1991 | 173.9 | 172.2 | 175.6 | 171.8 | 176.1 |
| 1992 | 181.4 | 180.6 | 182.1 | 180.4 | 182.3 |
| 1993 | 183.4 | 181.9 | 184.8 | 181.6 | 185.1 |
| 1994 | 187.5 | 184.7 | 190.3 | 184.0 | 191.1 |
| 1995 | 177.9 | 177.6 | 178.3 | 177.4 | 178.4 |
| 1996 | 171.6 | 169.1 | 174.1 | 168.4 | 174.7 |
| 1997 | 200.9 | 193.7 | 208.1 | 191.7 | 210.1 |
| 1998 | 175.1 | 173.8 | 176.4 | 173.4 | 176.8 |
| 1999 | 166.8 | 162.7 | 170.8 | 161.6 | 172.0 |
| 2000 | 164.6 | 159.8 | 169.4 | 158.5 | 170.7 |
| 2001 | 157.6 | 150.5 | 164.7 | 148.6 | 166.7 |
| 2002 | 178.2 | 178.0 | 178.5 | 177.9 | 178.6 |
| 2003 | 197.9 | 191.7 | 204.1 | 190.0 | 205.8 |
| 2004 | 189.4 | 186.0 | 192.8 | 185.0 | 193.7 |
| 2005 | 184.5 | 182.7 | 186.2 | 182.2 | 186.7 |
| 2006 | 182.5 | 181.4 | 183.7 | 181.1 | 184.0 |
| 2007 | 166.8 | 162.8 | 170.9 | 161.7 | 172.0 |
| 2008 | 155.4 | 147.6 | 163.2 | 145.5 | 165.4 |
| 2009 | 177.3 | 176.7 | 177.9 | 176.6 | 178.1 |
| 2010 | 182.2 | 181.2 | 183.2 | 180.9 | 183.5 |
| 2011 | 186.5 | 184.0 | 188.9 | 183.4 | 189.6 |
